# Supplementary material for: Physicochemical Properties and REE Distribution of the Northwest and Central Greece Coal Deposits: A Review
Source: MDPI journal article supplement (doi:10.3390/materproc2021005103), 2022-01-17
Supplement: s1 [file s1]

## Supplementary Material

**Table S1.** Averaged Trace element content for the xylite-rich and matrix lignite deposits of the Almyros basin [11,30]) and the Lavas-Servion basin [29].

| Region<br>mg/kg | Almyros Basin |        | Lavas-Servion Basin |                 |               |
|-----------------|---------------|--------|---------------------|-----------------|---------------|
|                 | Xylite-rich   | Matrix | Upper Lignite       | Interm. Lignite | Lower Lignite |
| As              | 22.60         | 27.60  | 3.40                | 11.50           | 13.00         |
| Cd              | -             | 0.40   | 0.60                | 0.80            | 0.90          |
| Ga              | 7.80          | 8.10   | 2.50                | 5.90            | 4.60          |
| Ge              | 4.80          | 3.20   | 0.10                | 0.70            | 0.50          |
| Ni              | 49.90         | 23.40  | 9.70                | 46.30           | 24.00         |
| Cr              | 57.20         | 136.00 | 22.60               | 52.40           | 34.40         |
| V               | 60.40         | 134.00 | 30.40               | 95.10           | 91.50         |
| Cu              | 7.90          | 10.10  | 11.10               | 21.30           | 25.60         |
| Co              | 5.40          | 3.80   | 3.90                | 6.30            | 5.00          |
| Pb              | 1.80          | 3.40   | 3.50                | 7.90            | 6.00          |
| Zn              | 17.00         | 10.40  | 60.80               | 88.50           | 56.90         |
| Ba              | 156.50        | 123.20 | 46.90               | 101.80          | 94.70         |
| Rb              | 6.40          | 8.60   | 4.30                | 16.30           | 13.50         |
| Sr              | 142.80        | 194.20 | 4.30                | 16.30           | 13.50         |
| U               | 17.40         | 26.80  | 1.90                | 5.20            | 8.90          |
| Th              | 0.80          | 1.30   | 2.00                | 4.40            | 4.20          |
| Nb              | 1.30          | 2.00   | 4.00                | 3.80            | 2.80          |
| Ta              | 0.00          | 1.20   | 1.80                | 0.10            | 0.20          |
| Zr              | 8.80          | 12.10  | 22.70               | 29.80           | 19.60         |
| Y               | 2.00          | 3.90   | 2.60                | 10.10           | 8.30          |

**Table S2.** Averaged Rare Earth Element (REE) content (ppm) for the xylite-rich and matrix lignite deposits of the Almyros basin [1,2] and the Lavas-Servion basin [3].

| <b>Region</b> | <b>Almyros Basin</b> |        | <b>Lavas-Servion Basin</b> |                 |               |
|---------------|----------------------|--------|----------------------------|-----------------|---------------|
| <b>mg/kg</b>  | Xylite-rich          | Matrix | Upper Lignite              | Interm. Lignite | Lower Lignite |
| <b>La</b>     | 2.30                 | 4.80   | 3.20                       | 8.80            | 6.40          |
| <b>Ce</b>     | 4.50                 | 9.50   | 8.10                       | 23.30           | 18.70         |
| <b>Pr</b>     | 0.50                 | 1.10   | 1.00                       | 2.50            | 2.10          |
| <b>Nd</b>     | 2.20                 | 4.50   | 3.20                       | 8.20            | 7.10          |
| <b>Sm</b>     | 0.40                 | 0.90   | 0.60                       | 2.00            | 1.60          |
| <b>Eu</b>     | 0.10                 | 0.20   | 0.10                       | 0.40            | 0.40          |
| <b>Tb</b>     | 0.05                 | 0.10   | 0.10                       | 0.40            | 0.30          |
| <b>Dy</b>     | 0.40                 | 0.80   | 0.50                       | 1.70            | 1.50          |
| <b>Ho</b>     | 0.05                 | 0.10   | 0.10                       | 0.40            | 0.30          |
| <b>Er</b>     | 0.20                 | 0.40   | 0.20                       | 1.00            | 0.80          |
| <b>Tm</b>     | 0.01                 | 0.05   | -                          | -               | -             |
| <b>Yb</b>     | 0.20                 | 0.40   | 0.20                       | 1.00            | 0.80          |
| <b>Lu</b>     | 0.01                 | 0.05   | -                          | -               | -             |
